# Supplementary material
Source: PubMed Central journal article supplement (PMC2707831)
Supplement: NIHMS99115-supplement-01.pdf [file NIHMS99115-supplement-01.pdf]

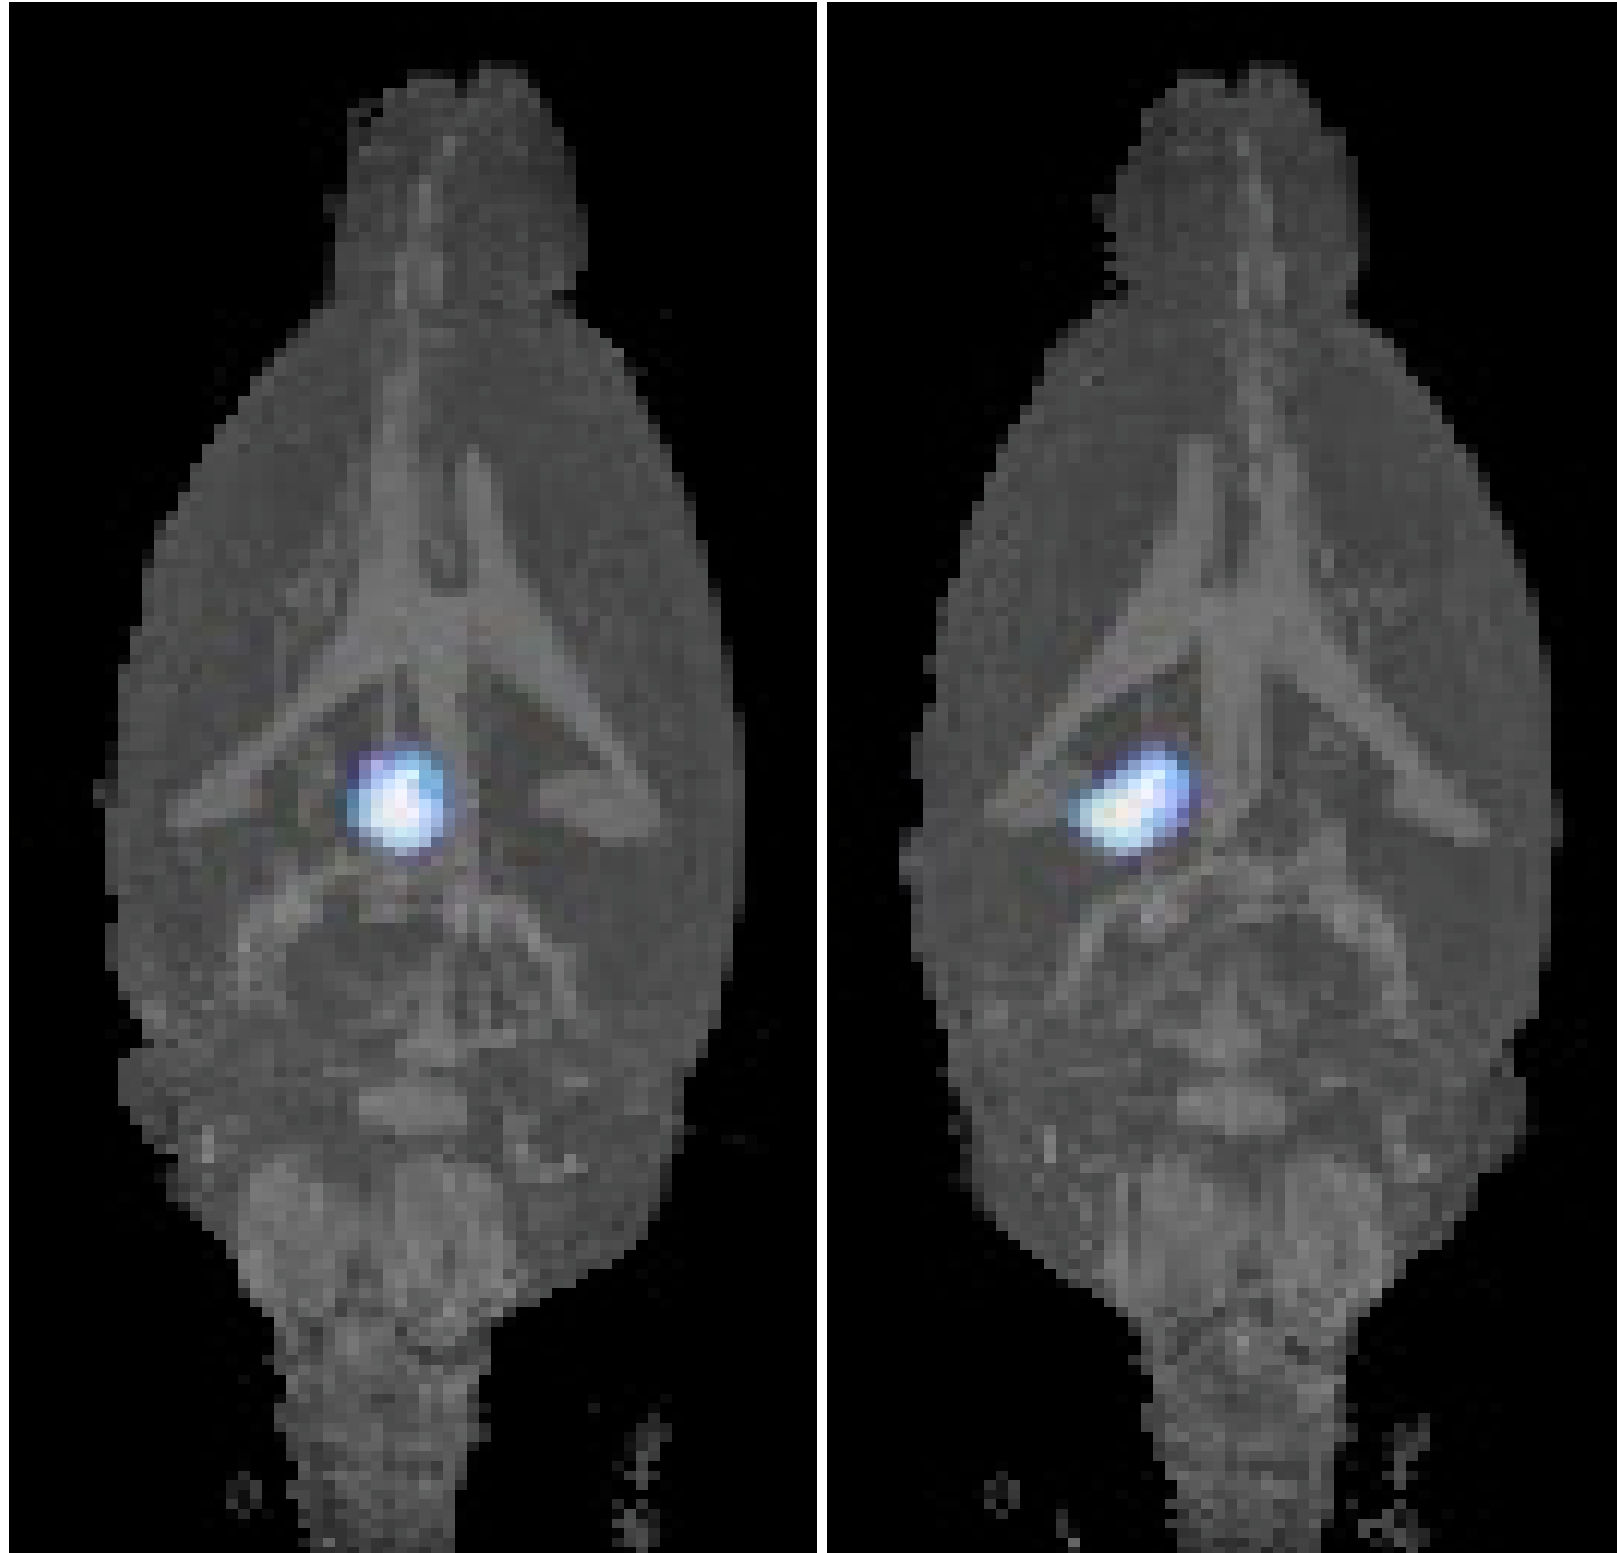

Figure S1

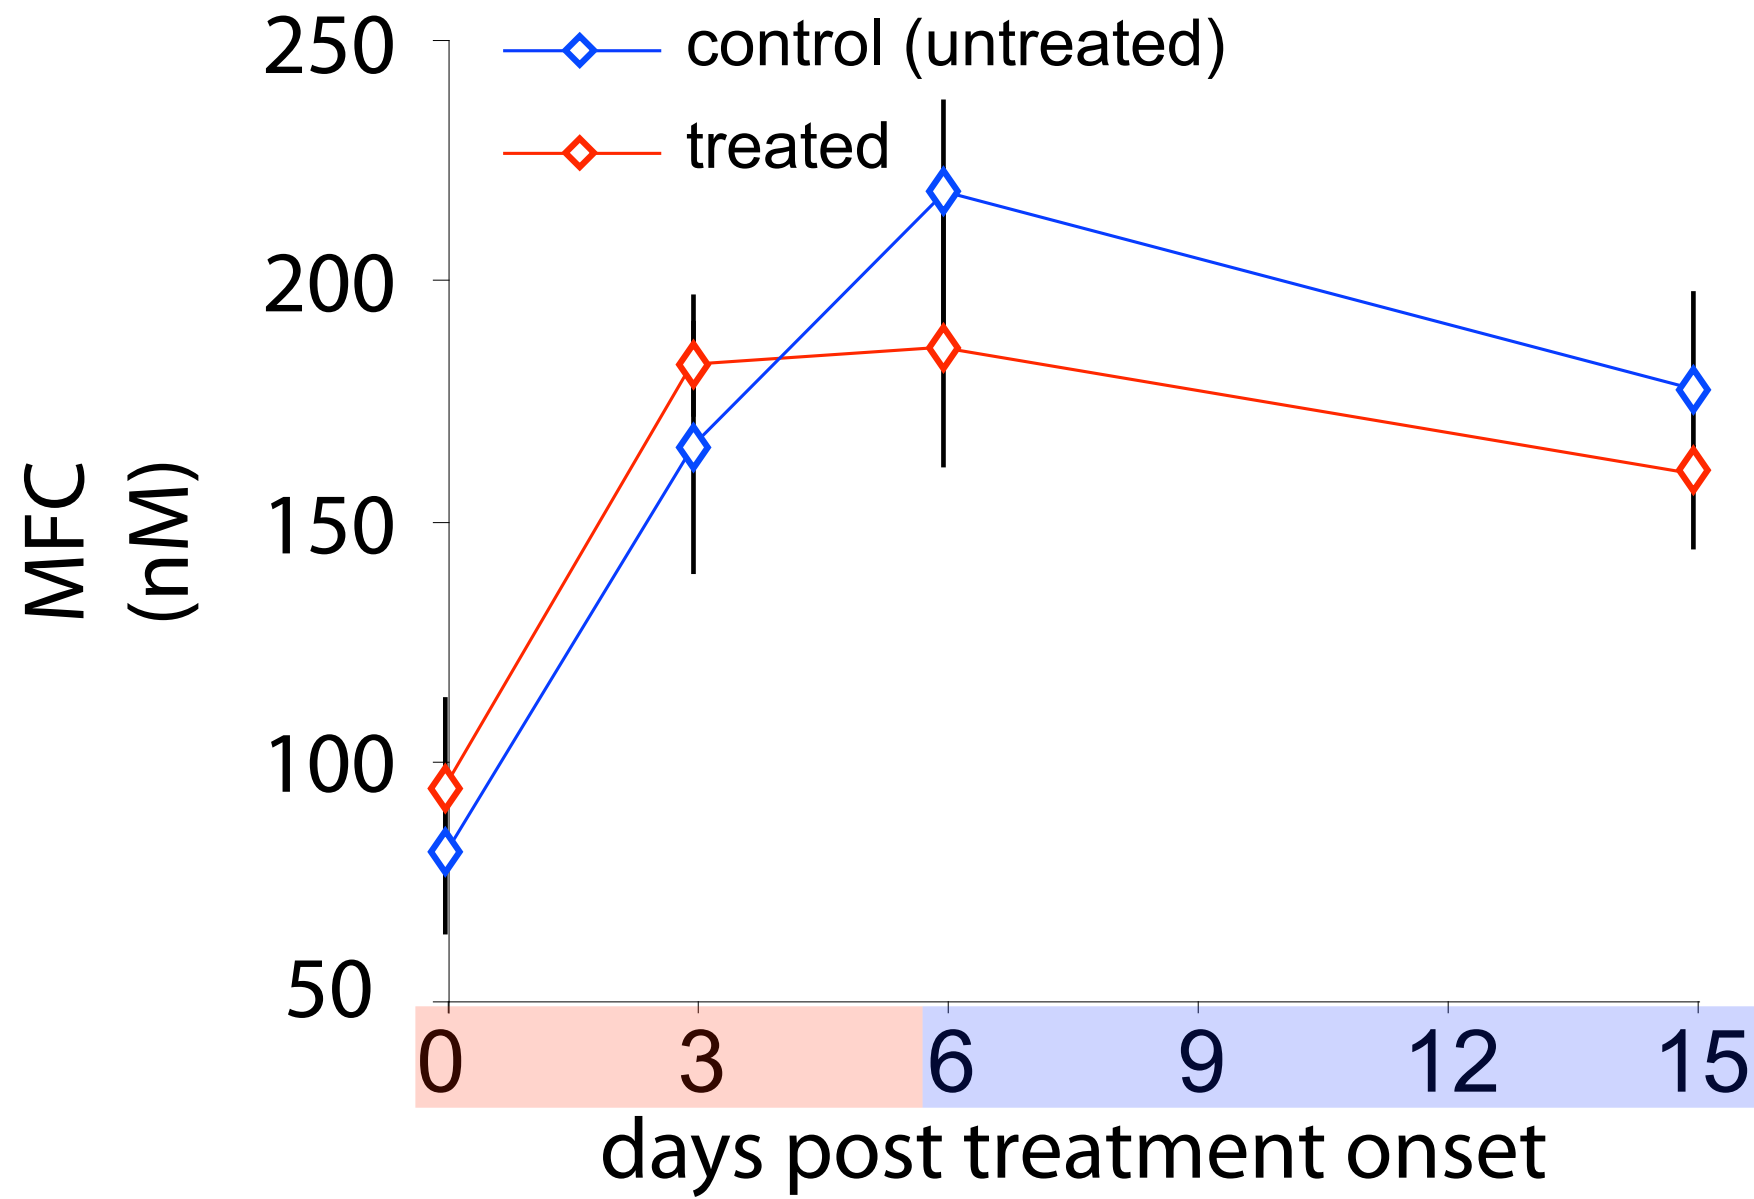

Figure S2

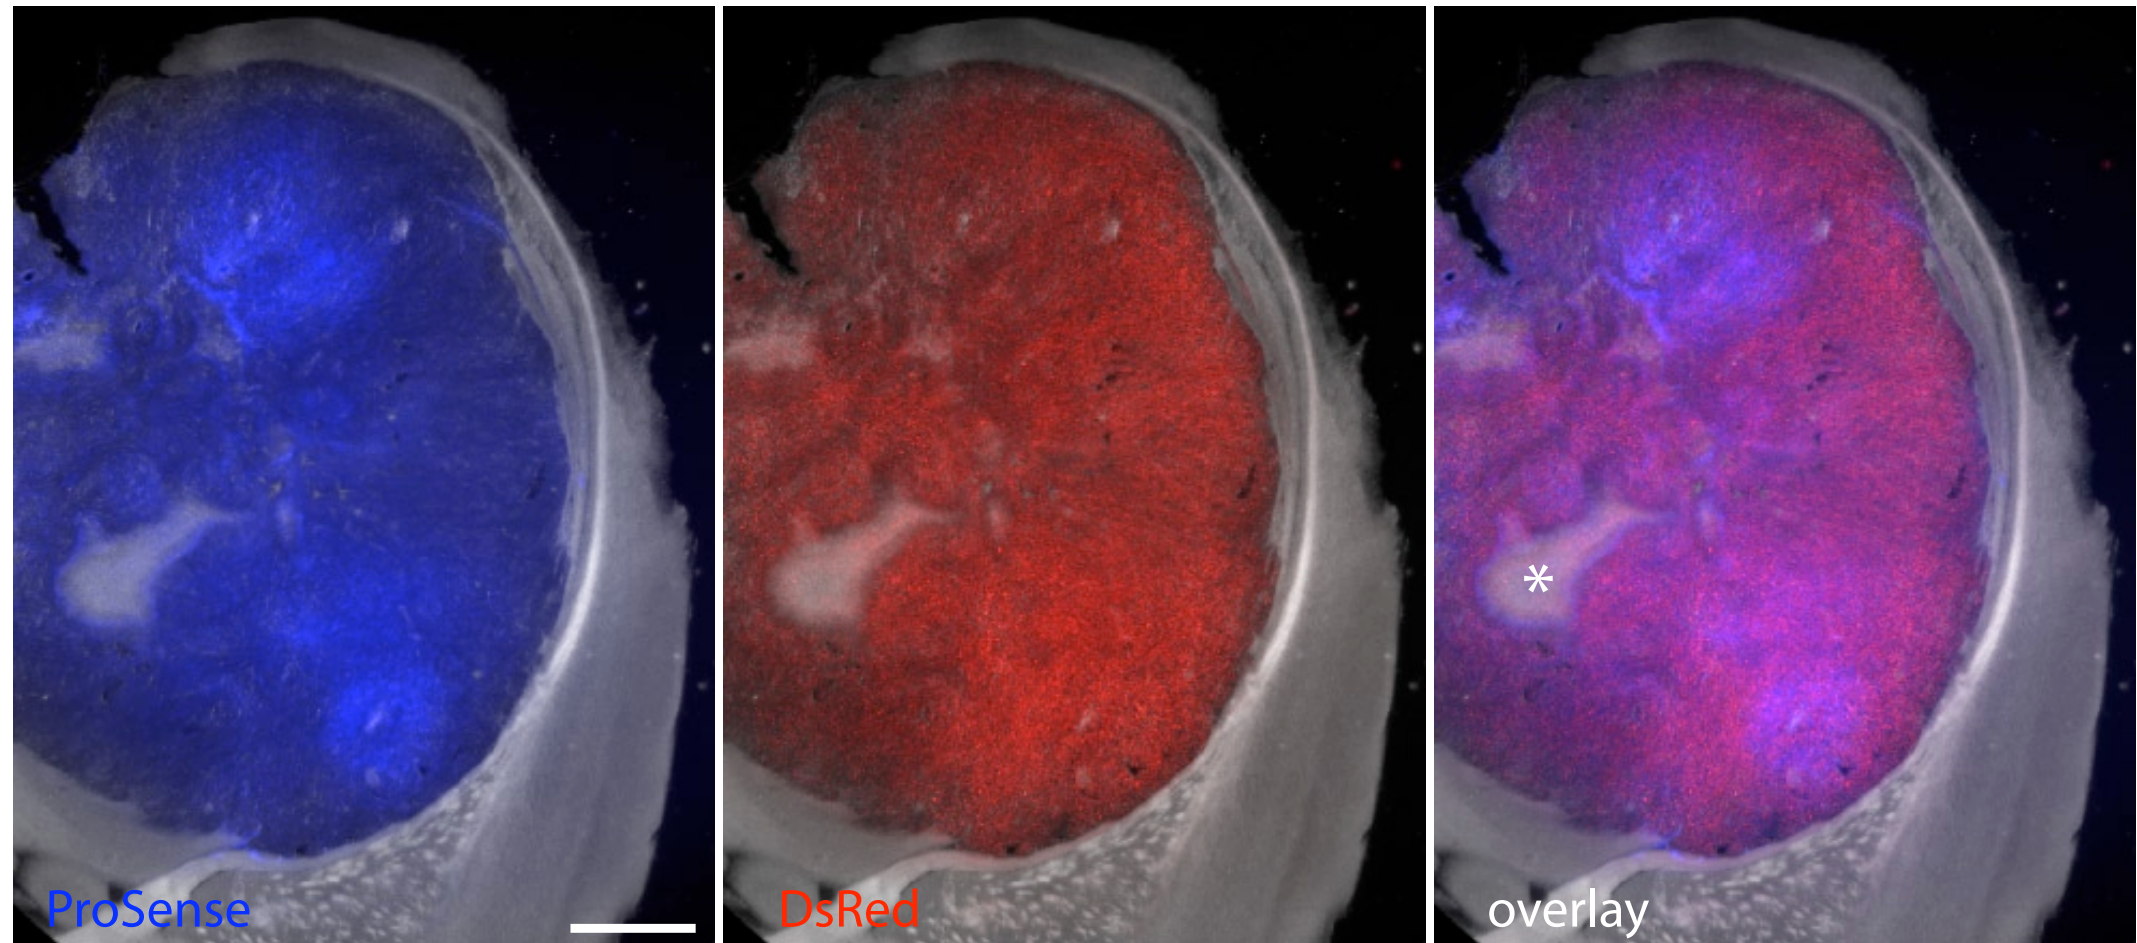

Figure S3

**6. Supplementary Material**

[Click here to download 6. Supplementary Material: SUPPORTING INFORMATION revised.doc](#)
